# Supplementary material
Source: PubMed Central journal article supplement (PMC8202070)
Supplement: NIHMS1696952-supplement-Supplementary_material.pdf [file NIHMS1696952-supplement-Supplementary_material.pdf]

## **Supplementary Material**

### **Contents**

Supplementary Table S1

Supplementary Table S2

**Supplementary Table S1. Characteristics of Hospitals in New York State among Dementia Cohort, Stratified by Institution of a Palliative Care Program**

|                                                              | Institution of Palliative Care Program |                         |
|--------------------------------------------------------------|----------------------------------------|-------------------------|
|                                                              | No<br>(N =29)                          | Yes<br>(N = 24)         |
| ICU Volume, Median (IQR) †                                   | 0.10 (0.07 – 0.13)                     | 0.09 (0.07 – 0.12)      |
| ICU Volume, N(%) †                                           |                                        |                         |
| 0.01 – 0.05                                                  | 1 (3.5)                                | 3 (12.5)                |
| 0.05 – 0.07                                                  | 6 (20.7)                               | 3 (12.5)                |
| 0.07 – 0.10                                                  | 4 (13.8)                               | 9 (37.5)                |
| 0.10 – 0.15                                                  | 12 (41.4)                              | 7 (29.2)                |
| 0.15 – 0.20                                                  | 1 (3.5)                                | 1 (4.2)                 |
| 0.20 – 0.50                                                  | 3 (10.3)                               | 1 (4.2)                 |
| Teaching hospital, N (%)*                                    | 12 (41.4)                              | 14 (58.3)               |
| Bed size, N (%) †                                            |                                        |                         |
| 100-399                                                      | 27 (93.1)                              | 19 (79.2)               |
| >=400                                                        | 2 (7.0)                                | 5 (20.8)                |
| Total admissions, median (IQR) †                             | 7,052 (4,818 – 10,114)                 | 12,115 (8,565 – 18,398) |
| Total surgical operations, median (IQR) †                    | 6,630 (3,756 – 8,219)                  | 8,450 (6,019 – 13,405)  |
| Full time equivalent physicians and dentists, median (IQR) † | 21 (7 – 45)                            | 29 (9 – 57)             |
| Full time equivalent registered nurses, median (IQR) †       | 244 (161 – 409)                        | 402 (256 – 617)         |

IQR, interquartile range.

\* As data was matched by hospital year, several hospitals had characteristics change during the study period. For the purposes of the table, each hospital was assigned based on the category to which they belonged for the majority of years of the study period.

† ICU volume was defined as the number of admissions at a hospital with intensive care/number of overall admissions. As data was matched by hospital year, hospitals had varying values by year. For the purposes of the table, values were averaged over the study period and assigned to each hospital prior to calculating summary statistics.

**Supplemental Table S2. Difference-in-Differences Analysis Examining the Effect of Instituting a Palliative Care Program on Resource Utilization in Patients with Dementia who transferred from a Skilled Nursing Facility (SNF) or Intermediate Care Facility (ICF)**

| <b>Primary Analysis</b>                                  |                                               |              |                      |                                                      |                |
|----------------------------------------------------------|-----------------------------------------------|--------------|----------------------|------------------------------------------------------|----------------|
|                                                          | <b>Unadjusted Outcomes</b>                    |              |                      | <b>Difference-in-Differences Estimator* (95% CI)</b> | <b>P value</b> |
|                                                          | <b>Institution of Palliative Care Program</b> |              |                      |                                                      |                |
|                                                          | <b>Yes (N =6,920)</b>                         |              | <b>No (N =5,023)</b> |                                                      |                |
| Primary Outcome                                          | <b>Before</b>                                 | <b>After</b> |                      |                                                      |                |
| Discharge to hospice, % <sup>‡</sup>                     | 4.2                                           | 7.0          | 4.1                  | 0.92<br>(0.43 – 1.42)                                | 0.76           |
| <b>Secondary Outcomes</b>                                |                                               |              |                      |                                                      |                |
| Dialysis, % <sup>‡</sup>                                 | 2.2                                           | 3.0          | 1.7                  | 1.17<br>(0.85 – 1.48)                                | 0.59           |
| Mechanical ventilation, % <sup>§</sup>                   | 42.8                                          | 51.2         | 25.1                 | 0.76<br>(0.16 – 1.36)                                | 0.43           |
| Hospital length of stay days, median (IQR) <sup>†§</sup> | 7 (4-11)                                      | 6 (3-11)     | 6 (3-9)              | 1.01<br>(1.00-1.03)                                  | 0.04           |
| Died during hospitalization                              | 7 (2-13)                                      | 6 (2-12)     | 5 (2-11)             | 1.00<br>(0.98-1.06)                                  | 0.62           |
| Survived to hospital discharge                           | 7 (4-10.5)                                    | 6 (4-10)     | 6 (4-9)              | 1.02<br>(1.00-1.05)                                  | 0.001          |
| ICU bed utilization days, median (IQR) <sup>†§</sup>     | 4 (2 – 7)                                     | 4 (2 – 8)    | 3 (1 – 5)            | 1.02<br>(0.81 – 1.24)                                | 0.83           |

CI, confidence interval; IQR, interquartile range; ICU, intensive care unit.

\* This column reports the relative risk, odds ratio or incidence rate ratio as appropriate. All models are adjusted for age, gender, race, type of insurance, urban residence, risk of mortality during hospitalization, year of admission, and hospital characteristics including teaching hospital, hospital bed size, total admissions per year/total number of beds, total number of surgical operations performed/total number of beds, full-time equivalent physicians/total number of beds, full-time equivalent registered nurses/total number of beds and ICU volume.

<sup>‡</sup> Results of multilevel robust poisson regression, with hospital as a random effect.

<sup>‡</sup> Results of multilevel logistic regression, with hospital as a random effect.

<sup>†</sup> Results of multilevel negative binomial regression, with hospital as a random effect.

<sup>§</sup> Only includes patients who died in ICU.
